# Supplementary material
Source: Royal Society of Chemistry journal article supplement (doi:10.1039/d6fo02196d)
Supplement: d6fo02196d1.pdf [file d6fo02196d1.pdf]

Supplementary Information - Mimicking Human Milk Functions: The Human Milk  
Oligosaccharide Building Block GlcNAc in Combination with GOS Protects the Intestinal  
Barrier in vitro

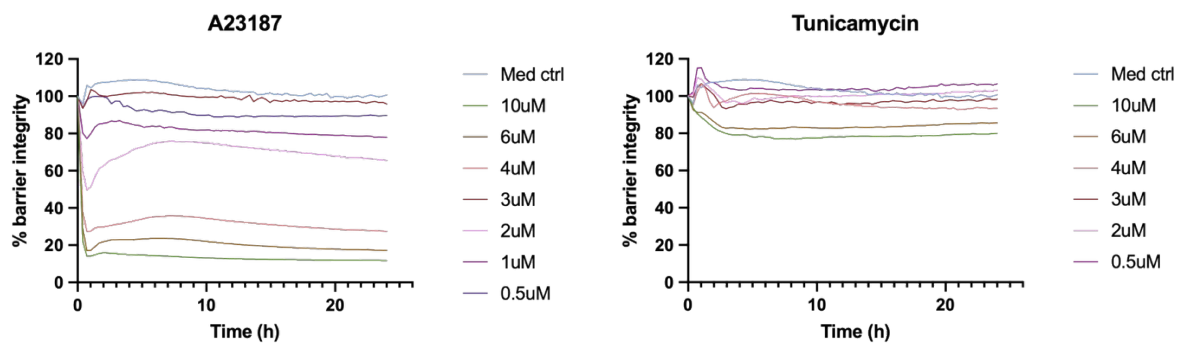

Figure S1: TEER dose-response curves for disruptors A23817 and TUN
